# Supplementary material for: Cleavage of BLOC1S1 mRNA by IRE1 Is Sequence Specific, Temporally Separate from XBP1 Splicing, and Dispensable for Cell Viability under Acute Endoplasmic Reticulum Stress
Source: PubMed Central journal article supplement (PMC4438243; doi:10.1128/mcb.00013-15), 2015-05-18
Supplement: MCB.00013-15_zmb999100856so5.pdf [file MCB.00013-15_zmb999100856so5.pdf]

Supplemental figure S4: Annotated sequence alignment of wild type and G444C BLOC1S1 expression constructs.

Annotation key:

**BLOC1S1 mRNA sequence**, Translation start site in bold, numbering from start site  
 Polyadenylation signal  
 Guanine or Cytosine 444  
 qPCR tag  
 Restriction sites for cloning

|                       |                                                            |     |
|-----------------------|------------------------------------------------------------|-----|
| WT_BLOC1S1_pRRLsin    | TATCGATCACGAGACTAGCCTCGACGTATACCCACGTG <b>GTTTAAACACAC</b> |     |
| G444C_BLOC1S1_pRRLsin | TATCGATCACGAGACTAGCCTCGACGTATACCCACGTG <b>GTTTAAACACAC</b> |     |
|                       | *****                                                      |     |
| WT_BLOC1S1_pRRLsin    | <b>AGCGGTCACGTGACATGGCCCCGGGGAGCCGAGGTGAGCGTTCCAGCTTC</b>  | 36  |
| G444C_BLOC1S1_pRRLsin | <b>AGCGGTCACGTGACATGGCCCCGGGGAGCCGAGGTGAGCGTTCCAGCTTC</b>  | 36  |
|                       | *****                                                      |     |
| WT_BLOC1S1_pRRLsin    | <b>CGGAGCCGGAGGGGGCCCCGGGTACCCAGCCCCAGCCCCAGCTGACCAAT</b>  | 86  |
| G444C_BLOC1S1_pRRLsin | <b>CGGAGCCGGAGGGGGCCCCGGGTACCCAGCCCCAGCCCCAGCTGACCAAT</b>  | 86  |
|                       | *****                                                      |     |
| WT_BLOC1S1_pRRLsin    | <b>GCTGTCCCCTCCTAAAAGAACACCAGGCCAAGCAGAATGAACGCAAGG</b>    | 136 |
| G444C_BLOC1S1_pRRLsin | <b>GCTGTCCCCTCCTAAAAGAACACCAGGCCAAGCAGAATGAACGCAAGG</b>    | 136 |
|                       | *****                                                      |     |
| WT_BLOC1S1_pRRLsin    | <b>AGCTGCAGGAAAAGAGGAGGCGAGAGGCTATCACTGCAGCGACCTGCCTG</b>  | 186 |
| G444C_BLOC1S1_pRRLsin | <b>AGCTGCAGGAAAAGAGGAGGCGAGAGGCTATCACTGCAGCGACCTGCCTG</b>  | 186 |
|                       | *****                                                      |     |
| WT_BLOC1S1_pRRLsin    | <b>ACAGAAGCTTTGGTGGATCACCTCAATGTGGGTGTGGCCAGGCCCTACAT</b>  | 236 |
| G444C_BLOC1S1_pRRLsin | <b>ACAGAAGCTTTGGTGGATCACCTCAATGTGGGTGTGGCCAGGCCCTACAT</b>  | 236 |
|                       | *****                                                      |     |
| WT_BLOC1S1_pRRLsin    | <b>GAACCAGAGAAAAGCTGGACCATGAGGTGAAGACCCTACAGGTCCAGGCTG</b> | 286 |
| G444C_BLOC1S1_pRRLsin | <b>GAACCAGAGAAAAGCTGGACCATGAGGTGAAGACCCTACAGGTCCAGGCTG</b> | 286 |
|                       | *****                                                      |     |
| WT_BLOC1S1_pRRLsin    | <b>CCCAATTTGCCAAGCAGACAGGCCAGTGGATCGGAATGGTGGAGAACTTC</b>  | 336 |
| G444C_BLOC1S1_pRRLsin | <b>CCCAATTTGCCAAGCAGACAGGCCAGTGGATCGGAATGGTGGAGAACTTC</b>  | 336 |
|                       | *****                                                      |     |
| WT_BLOC1S1_pRRLsin    | <b>AACCAGGCACCTCAAGGAAATGGGGATGTGGAGAAGTGGGCTCGGAGCAT</b>  | 386 |
| G444C_BLOC1S1_pRRLsin | <b>AACCAGGCACCTCAAGGAAATGGGGATGTGGAGAAGTGGGCTCGGAGCAT</b>  | 386 |
|                       | *****                                                      |     |
| WT_BLOC1S1_pRRLsin    | <b>CGAGCTGGACATGCGCACCATTGCCACTGCACTGGAATATGTCTACAAAG</b>  | 436 |
| G444C_BLOC1S1_pRRLsin | <b>CGAGCTGGACATGCGCACCATTGCCACTGCACTGGAATATGTCTACAAAG</b>  | 436 |
|                       | *****                                                      |     |
| WT_BLOC1S1_pRRLsin    | <b>GGCAGCTGCAGTCTGCCCTTCCTAGCCCCTGTTCCCTCCCCAACCCCTA</b>   | 486 |
| G444C_BLOC1S1_pRRLsin | <b>GGCAGCTGCAGTCTGCCCTTCCTAGCCCCTGTTCCCTCCCCAACCCCTA</b>   | 486 |
|                       | *****                                                      |     |
| WT_BLOC1S1_pRRLsin    | <b>TCCCTCCTACCTCACCCGAGGGGAAGGAGGGAGGCTGACAAGCCTTGA</b>    | 536 |
| G444C_BLOC1S1_pRRLsin | <b>TCCCTCCTACCTCACCCGAGGGGAAGGAGGGAGGCTGACAAGCCTTGA</b>    | 536 |
|                       | *****                                                      |     |
| WT_BLOC1S1_pRRLsin    | <b>ATAAAACACAAGCCTCCGTTTCTCGAGCCACGTATCGCCTGACTCTGTGG</b>  | 586 |
| G444C_BLOC1S1_pRRLsin | <b>ATAAAACACAAGCCTCCGTTTCTCGAGCCACGTATCGCCTGACTCTGTGG</b>  | 586 |
|                       | *****                                                      |     |
| WT_BLOC1S1_pRRLsin    | <b>TGTGTTT</b> CAGACTAGTCTCGTGCAGATGGACAGCACCGCTGAGCAATGGA | 636 |
| G444C_BLOC1S1_pRRLsin | <b>TGTGTTT</b> CAGACTAGTCTCGTGCAGATGGACAGCACCGCTGAGCAATGGA | 636 |
|                       | *****                                                      |     |
